# Supplementary material for: B-α-[AsW9O33]9− polyoxometalates incorporating hexanuclear uranium {U6O8}-like clusters bearing the UIV form or unprecedented mixed valence UIV/UVI involving direct UVIO–UIV bonding
Source: Royal Society of Chemistry journal article supplement (doi:10.1039/c5dt02932e), 2015-01-01
Supplement: c5dt02932e1.pdf [file c5dt02932e1.pdf]

# **B- $\alpha$ -[AsW<sub>9</sub>O<sub>33</sub>]<sup>9-</sup> polyoxometalates incorporating hexanuclear uranium {U<sub>6</sub>O<sub>8</sub>}-like clusters bearing the U<sup>IV</sup> form or unprecedented mixed valence U<sup>IV</sup> - U<sup>VI</sup> involving cation-cation interaction.**

Sylvain Duval,<sup>†,\*</sup> Sophie Sobanska,<sup>‡</sup> Pascal Roussel,<sup>†</sup> and Thierry Loiseau<sup>†</sup>

<sup>†</sup>*Unité de Catalyse et Chimie du Solide (UCCS) – UMR CNRS 8181, Université de Lille Nord de France, USTL-ENSCL, Bat C7, BP 90108, 59652 Villeneuve d'Ascq, France*

<sup>‡</sup>*Laboratoire de Spectrochimie Infrarouge et Raman (LASIR) – UMR CNRS 8516, Université Lille Nord de France, Bat C5, 59652 Villeneuve d'Ascq, France.*

## **Experimental section**

### Single-crystal X-ray diffraction

Crystal of **1-3** were selected under polarizing optical microscope and glued on a mitegen loop for single-crystal X-ray diffraction experiments. Because of the instability of the crystalline network due to the loss of crystallization water from the lattice, all measurements were performed at 100K under a nitrogen flow. X-ray intensity data were collected on a Bruker X8-APEX2 CCD area-detector diffractometer using Mo- $K_{\alpha}$  radiation ( $\lambda = 0.71073 \text{ \AA}$ ) with an optical fiber as collimator. Several sets of narrow data frames (10 s per frame) were collected at different values of  $\theta$  for two initial values of  $\phi$  and  $\omega$ , respectively, using  $0.3^{\circ}$  increments of  $\phi$  or  $\omega$ . Data reduction was accomplished using SAINT V7.53a.<sup>1</sup> The absorption was performed using a numerical absorption correction based on the faces indexation of the crystal (SADABS V2.10).<sup>2</sup> The structure was solved by direct methods, developed by successive difference Fourier syntheses, and refined by full-matrix least-squares on all  $F^2$  data using SHELX program suite.<sup>3</sup> The final refinements include anisotropic thermal parameters of all non-hydrogen atoms, except the nearly NPD oxygen atoms of the molecules or solvent water molecules. The crystal data are given in Table S1. Supporting information is available in CIF format.

### Infrared spectroscopy

Infrared spectra of the compounds (see Supplementary information) were measured on Perkin Elmer Spectrum Two<sup>TM</sup> spectrometer between 4000 and 400  $\text{cm}^{-1}$ , equipped with a diamond Attenuated Total Reflectance (ATR) accessory. Spectra are shown in Figure S5.

### Micro-Raman spectroscopy

Micro-Raman spectroscopy was performed on a LabRam HR visible spectrometer equipped with a HeNe laser at 633 nm. Spectra were measured between 1200 and 400  $\text{cm}^{-1}$ . The spectrum is equipped with a CCD 1024x256 pixels chip MPP Back illuminated Deep

Depleted detector cooled with liquid nitrogen. The samples are placed on a motorized XY sample holder with 0.1  $\mu\text{m}$  resolution. Spectra are shown in Figure S6.

#### SEM photography's

Images of the crystals of the three compounds are shown in Figure S7. Photography's of the crystals were performed on a HITACHI S3400N SEM equipped with a tungsten filament.

#### Thermogravimetric analysis

The thermogravimetric experiments have been carried out on a thermoanalyzer TGA 92 SETARAM under air atmosphere with a heating rate of  $1^\circ\text{C}\cdot\text{min}^{-1}$  from room temperature up to  $800^\circ\text{C}$ . Curves are shown in Figure S8.

#### Inductively Coupled Plasma Spectroscopy

Crystals of compound **1-3** were dissolved in 2%  $\text{HNO}_3$  solutions and were analyzed using a Vista-Pro Varian ICP-OES. Each compound was analyzed separately to determine the Na/As/W/U ratios. Based on the number of W atoms in each compounds, the percentages of each element can be determined.

#### EPR measurements

The spectra of the compounds were recorded at a temperature of 5K using an ELEXYS E580E X band spectrometer. The amplitude modulation and microwave power was set to respectively 5G and 2mW

### **Synthesis**

*Caution! Uranium tetrachloride ( $\text{UCl}_4$ ) is a radioactive and chemically toxic reactant, so precautions with suitable care and protection for handling such substances have been followed.*

The compound has been synthesized by using the following chemical reactants: uranium tetrachloride ( $\text{UCl}_4$ , obtained from the protocol using the reaction of hexachloropropene with uranium oxide), acetate buffer (solution made by using glacial acetic acid (Carlo Erba reagent, 99.9%) and sodium acetate (Merck, 99%)). The starting chemical reactants (except  $\text{UCl}_4$ ) are commercially available and have been used without any further purification.  $\text{B-Na}_9[\alpha\text{-AsW}_9\text{O}_{33}]\cdot 13\text{H}_2\text{O}$  was synthesized according to a literature procedure.<sup>4</sup>

#### Compound 1 and 2

$\text{Na}_9[\text{B-}\alpha\text{-AsW}_9\text{O}_{33}]\cdot 13\text{H}_2\text{O}$  (250 mg, 0.093 mmol) is dissolved in 5 ml of 1M acetate buffer (pH = 4.7). The solution is then added to green solid  $\text{UCl}_4$  (106 mg, 0.28 mmol). The solution turns to brown quickly and is stirred and heated to  $70^\circ\text{C}$  for 30 minutes. The solution is left to crystallize at room temperature by slow evaporation of the solvent. After 1 day, brown block like crystals started to appear (compound **1**) and were collected. The following day, small clear brown parallelepiped crystals (compound **2**) suitable for X-ray diffraction analyses started to appear and were gathered after 1 day before accumulation of a great quantity of  $\text{Na}[\text{U}^{\text{VI}}\text{O}_2(\text{OAc})_3]$  (OAc = acetate) as yellow octahedral crystals obtained by partial oxidation

of the tetravalent uranium in solution.<sup>5</sup> ( $m_{cp1} = 31$  mg, yield = 11% and,  $m_{cp2} = 78$  mg, yield = 26% based on  $AsW_9O_{33}$ ).

(1) IR ( $cm^{-1}$ ): 939 (w), 857(m), 808(shoulder), 776(w), 715(shoulder), 669(m), 635(m), 455(m).

ICP-OES for  $Na_{19}[(AsW_9O_{33})_3(OAc)_2(U^{IV})_{5.5}(\mu^3-OH)_4(\mu^3-O)_4(U^{VI}O)_{0.5}] \cdot 47H_2O$ : Na (3.77%), As (2.10%), W (47.34%), U(14.26%). Calculated: Na (4.22%), As (2.17%), W (47.93%), U(13.79%)/

(2) IR ( $cm^{-1}$ ): 980 (shoulder) 946 (w), 852(m), 818(shoulder), 785(w), 717 (shoulder), 672(m), 640(m), 499(m), 460(m).

ICP-OES for  $Na_{15}[(AsW_9O_{33})_3(U^{IV})_3(U^{VI}O)_3](\mu^3-OH)_4(\mu^3-O)_4 \cdot 32H_2O$ : Na (3.36%), As (2.38%), W (50.73%), U(15.08%). Calculated: Na (3.54%), As (2.31%), W (50.93%), U(14.65%).

### Compound 3:

$Na_9[B-\alpha-AsW_9O_{33}] \cdot 13H_2O$  (250 mg, 0.093 mmol) is dissolved in 3 ml of 0.2M acetate buffer (pH = 4.7). The solution is then added to green solid  $UCl_4$  (74 mg, 0.19 mmol). The solution turns to brown quickly and is stirred and heated to 70 °C for 30 minutes. The solution is left to crystallize at room temperature by slow evaporation of the solvent. After 3 days, small brown octahedral crystals suitable for X-ray diffraction analyses started to appear. After 1 week, the crystals were collected quickly ( $m = 17$  mg, yield = 6% based on  $AsW_9O_{33}$ ).

IR ( $cm^{-1}$ ): 944(w), 864(m), 784(w), 676(s), 646(s), 457(s).

ICP-OES for  $Na_{24}[(AsW_9O_{33})_4(U^{IV})_6(\mu^3-OH)_4(\mu^3-O)_4] \cdot 42H_2O$  Na (4.15%), As (2.30%), W (53.34%), U(11.32%). Calculated: Na (4.42%), As (2.40%), W (53.02%), U(11.44%).

## Characterisations

### X-Ray diffraction

Table S1: Crystal data and structure refinement for compound 1, 2 and 3.

|                      | Compound 1                                  | Compound 2                            | Compound 3                    |
|----------------------|---------------------------------------------|---------------------------------------|-------------------------------|
| Formula              | $Na_{15.50}As_3W_{27}U_6C_{3.89}O_{164.47}$ | $Na_{7.5}As_{1.5}W_{13.5}U_3O_{84.5}$ | $Na_{12}As_4W_{36}U_6O_{198}$ |
| Formula weight       | 9651.54                                     | 4832.87                               | 11790.34                      |
| Temperature/K        | 100                                         | 100                                   | 100                           |
| Crystal color        | brown                                       | clear brown                           | brown                         |
| Crystal size/mm      | 0.15 x 0.15 x 0.1                           | 0.08 x 0.05 x 0.05                    | 0.1 x 0.1 x 0.1               |
| Crystal system       | monoclinic                                  | monoclinic                            | cubic                         |
| Space group          | $P2_1/n$                                    | $P2_1/m$                              | $Fd-3$                        |
| $a/\text{Å}$         | 17.9019(5)                                  | 13.7846(8)                            | 38.6891(8)                    |
| $b/\text{Å}$         | 35.9438(11)                                 | 31.0033(14)                           | 38.6891(8)                    |
| $c/\text{Å}$         | 26.0511(9)                                  | 17.7568(8)                            | 38.6891(8)                    |
| $\alpha/^\circ$      | 90                                          | 90                                    | 90                            |
| $\beta/^\circ$       | 103.4544(19)                                | 91.543(3)                             | 90                            |
| $\gamma/^\circ$      | 90                                          | 90                                    | 90                            |
| Volume/ $\text{Å}^3$ | 16302.9(9)                                  | 7585.9(7)                             | 57912(2)                      |

|                                                             |                                                                      |                                                                      |                                                                      |
|-------------------------------------------------------------|----------------------------------------------------------------------|----------------------------------------------------------------------|----------------------------------------------------------------------|
| Z, $\rho_{\text{calculated}}/\text{g}\cdot\text{cm}^{-3}$   | 4, 3.932                                                             | 4, 4.209                                                             | 8, 2.705                                                             |
| $\mu/\text{mm}^{-1}$                                        | 25.661                                                               | 27.575                                                               | 18.126                                                               |
| $\theta$ range/ $^{\circ}$                                  | 1.38-26.41                                                           | 1.31-29.18                                                           | 1.05-26.38                                                           |
| Limiting indices                                            | -22 $\leq h \leq$ 22<br>-42 $\leq k \leq$ 44<br>-32 $\leq l \leq$ 32 | -18 $\leq h \leq$ 18<br>-42 $\leq k \leq$ 42<br>-24 $\leq l \leq$ 24 | -33 $\leq h \leq$ 48<br>-48 $\leq k \leq$ 35<br>-47 $\leq l \leq$ 46 |
| Collected reflections                                       | 237316                                                               | 254548                                                               | 60048                                                                |
| Unique reflections                                          | 33291<br>[R(int) = 0.0684]                                           | 20819<br>[R(int) = 0.0681]                                           | 4979<br>[R(int) = 0.0800]                                            |
| Parameters                                                  | 1137                                                                 | 996                                                                  | 184                                                                  |
| Goodness-of-fit on $F^2$                                    | 1.097                                                                | 1.065                                                                | 1.052                                                                |
| Final R indices [ $I > 2\sigma(I)$ ]                        | R1 = 0.0651<br>wR2 = 0.1309                                          | R1 = 0.0380<br>wR2 = 0.0798                                          | R1 = 0.0385<br>wR2 = 0.0894                                          |
| R indices (all data)                                        | R1 = 0.0996<br>wR2 = 0.1455                                          | R1 = 0.0696<br>wR2 = 0.0933                                          | R1 = 0.0558<br>wR2 = 0.1001                                          |
| Largest diff. peak and hole/ $\text{e}\cdot\text{\AA}^{-3}$ | 4.20 and -4.00                                                       | 2.49 and -2.47                                                       | 3.10 and -0.88                                                       |

Table S2: BVS calculations of bridging oxygen atoms in the uranium clusters of compound **1**.

| Compound <b>1</b> |      |             |
|-------------------|------|-------------|
| Atom              | BVS  | Attribution |
| O8                | 2.17 | O           |
| O9                | 1.13 | OH          |
| O10               | 1.22 | OH          |
| O11               | 1.17 | OH          |
| O12               | 2.05 | O           |
| O13               | 2.08 | O           |
| O14               | 2.08 | O           |
| O15               | 1.10 | OH          |

Table S3: Oxygen coordination sphere distances and bond valence calculations of the substitutionally disordered uranium (U1) atom of compound **1** under its tetravalent and hexavalent form.

| Tetravalent                        |              | Hexavalent                         |              |
|------------------------------------|--------------|------------------------------------|--------------|
| U-O bond distance ( $\text{\AA}$ ) | Bond valence | U-O bond distance ( $\text{\AA}$ ) | Bond valence |
| U – O12 = 2.115                    | 0.992        | U – O1 = 1.717                     | 2.629        |
| U – O8 = 2.227                     | 0.733        | U – O12 = 2.115                    | 0.897        |
| U – O17 = 2.303                    | 0.597        | U – O8 = 2.227                     | 0.663        |
| U – O16 = 2.327                    | 0.560        | U – O17 = 2.303                    | 0.540        |
| U – O11 = 2.424                    | 0.432        | U – O16 = 2.327                    | 0.507        |
| U – O9 = 2.441                     | 0.416        | U – O11 = 2.424                    | 0.391        |
| U – O2 = 2.473                     | 0.377        | U – O9 = 2.441                     | 0.372        |
| U – O4 = 2.512                     | 0.340        |                                    |              |
| BVS ( $\text{U}^{\text{IV}}$ )     | 4.447        | BVS ( $\text{U}^{\text{VI}}$ )     | 5.999        |

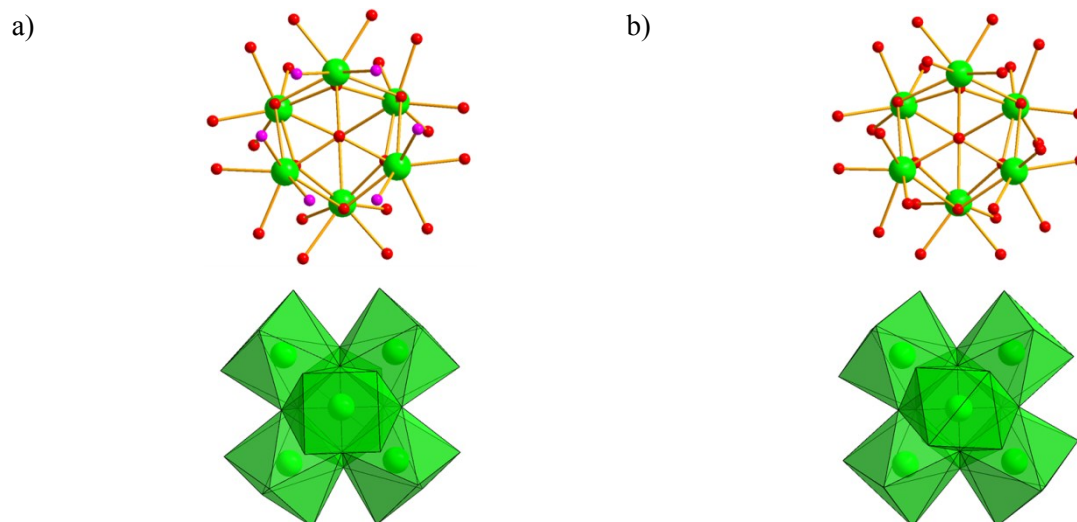

Figure S1: Comparison of the two hexameric  $\{U^{IV}_6O_8\}$  clusters in compound **1** (left) and **3** (right). View through the oxygen atoms of the three acetate ligands in **1** and through one POM unit in **3**.

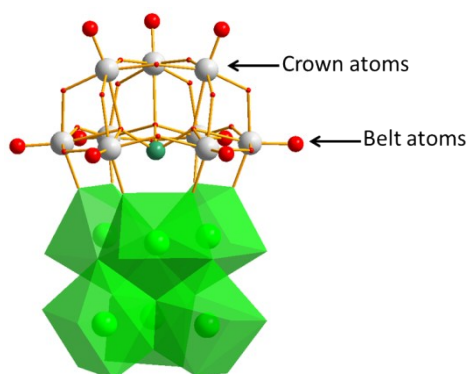

Figure S2: Position of the belt and crown atoms of the polyanionic moieties.

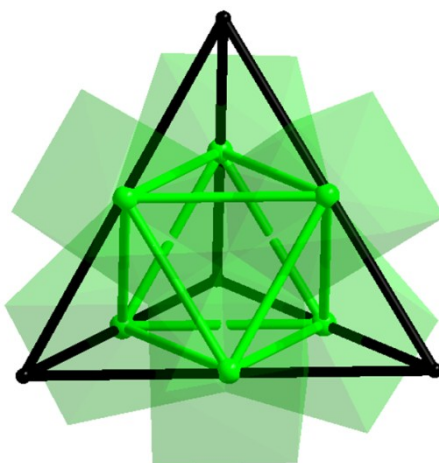

Figure S3: Octahedral inclusion of the tetraivalent uranium cluster in the tetrahedron delimited by the four As atoms of the polyanionic moieties.

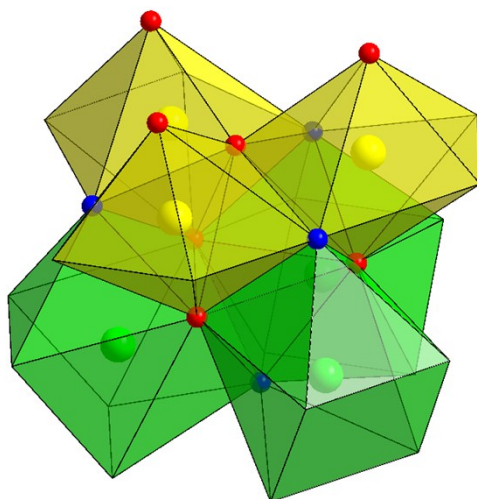

Figure S4: Polyhedral representation of the cluster involved in the CCI. Terminal O”yl” atoms and  $\mu^3$ -O bridges are represented in red and  $\mu^3$ -OH bridges are in blue. Green and yellow polyhedra respectively represent the tetravalent and hexavalent uranium atoms.

### IR and Raman spectroscopies

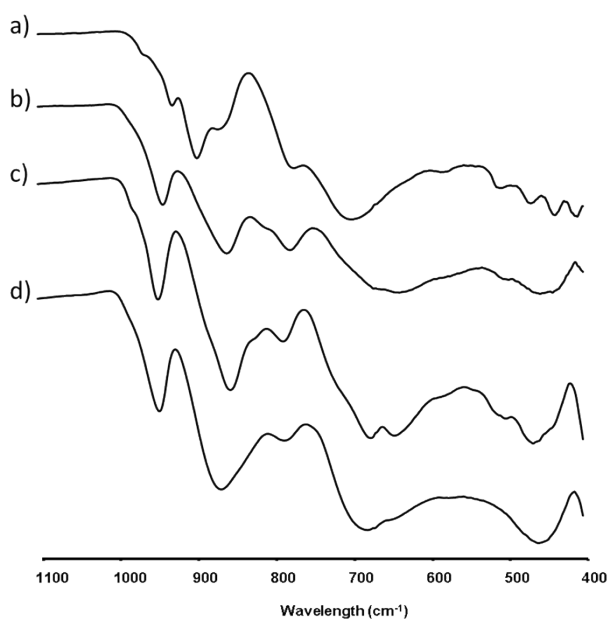

Figure S5: Comparison of the IR Spectra of  $[\text{AsW}_9\text{O}_{33}]^{9-}$  (a),  $\text{Na}_{19}[(\text{AsW}_9\text{O}_{33})_3(\text{OAc})_2(\text{U}^{\text{IV}})_{5.5}(\mu^3\text{-OH})_4(\mu^3\text{-O})_4\text{O}(\text{U}^{\text{VI}}\text{O})_{0.5}]$  (b),  $[\text{U}^{\text{IV}}_3\text{U}^{\text{VI}}_3\text{O}_3(\text{m}^3\text{-O})_4(\text{m}^3\text{-OH})_4(\text{AsW}_9\text{O}_{33})_3]^{15-}$  (c) and  $[\text{U}_6(\text{m}^3\text{-O})_4(\text{m}^3\text{-OH})_4(\text{AsW}_9\text{O}_{33})_4]^{24-}$  (d)

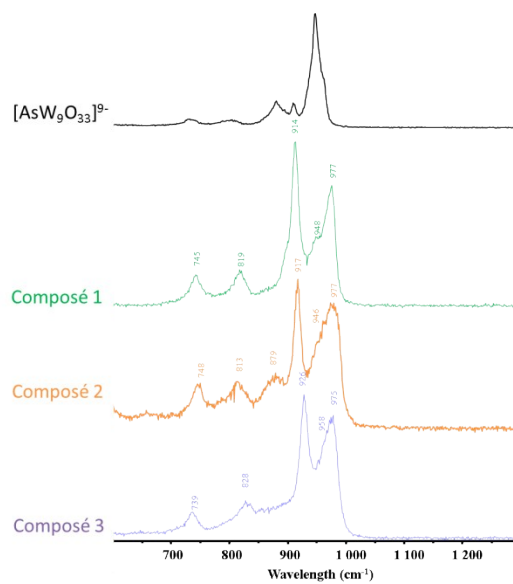

Figure S6: Comparison of the Raman Spectra of  $[\text{AsW}_9\text{O}_{33}]^{9-}$ ,  $\text{Na}_{19}[(\text{AsW}_9\text{O}_{33})_3(\text{OAc})_2(\text{U}^{\text{IV}})_{5.5}(\mu^3\text{-OH})_4(\mu^3\text{-O})_4\text{O}(\text{U}^{\text{VI}}\text{O})_{0.5}]$  (compound 1),  $[\text{U}^{\text{IV}}_3\text{U}^{\text{VI}}_3\text{O}_3(\text{m}^3\text{-O})_4(\text{m}^3\text{-OH})_4(\text{AsW}_9\text{O}_{33})_3]^{15-}$  (compound 2) and  $[\text{U}_6(\text{m}^3\text{-O})_4(\text{m}^3\text{-OH})_4(\text{AsW}_9\text{O}_{33})_4]^{24-}$  (compound 3)

*SEM and microscopic images*

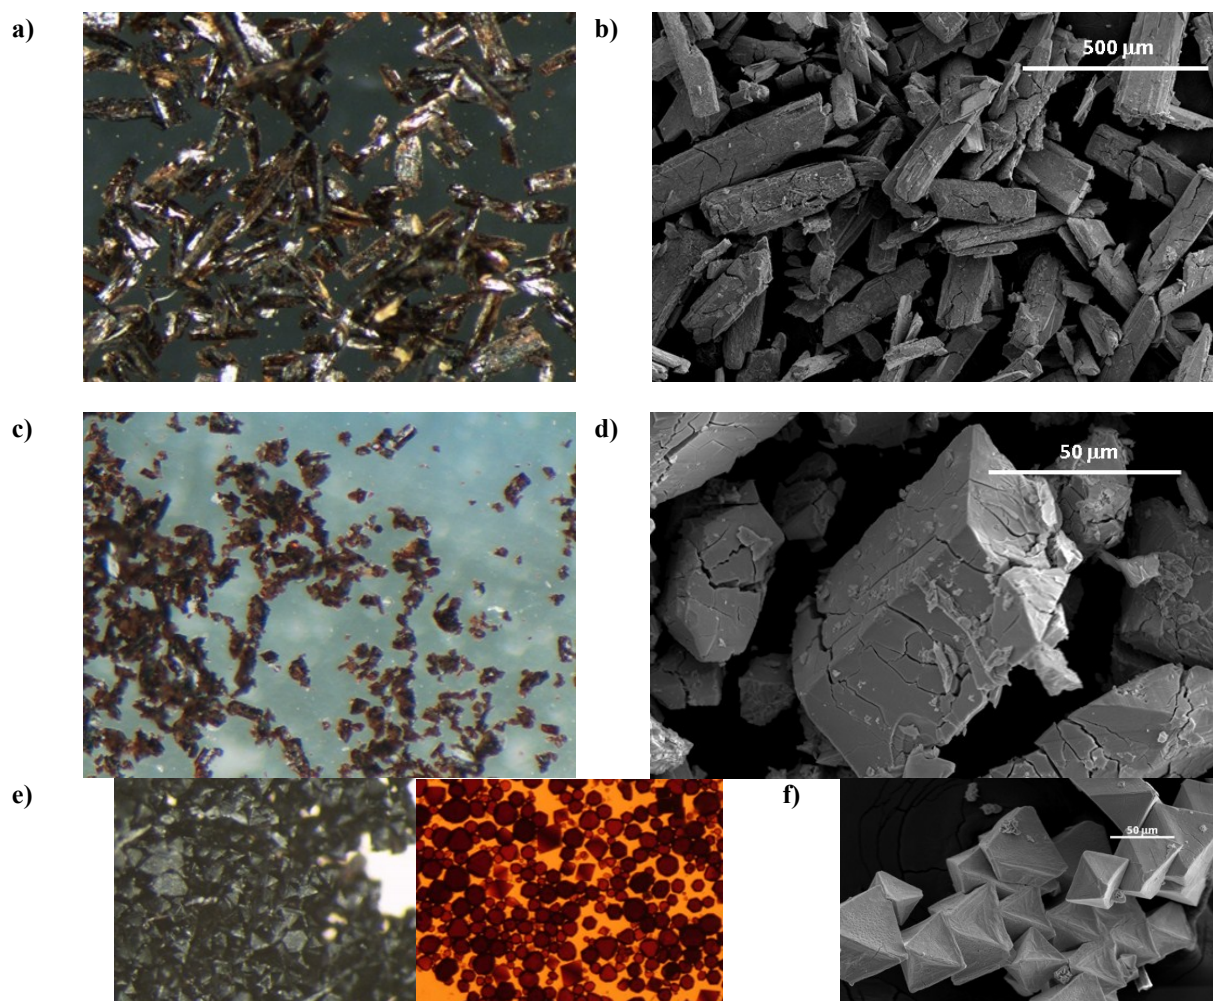

Figure S7: Binocular (left) and SEM (right) images of compound 1 (a-b), compound 2 (c-d) and compound 3 (e-f).

### TGA analyses

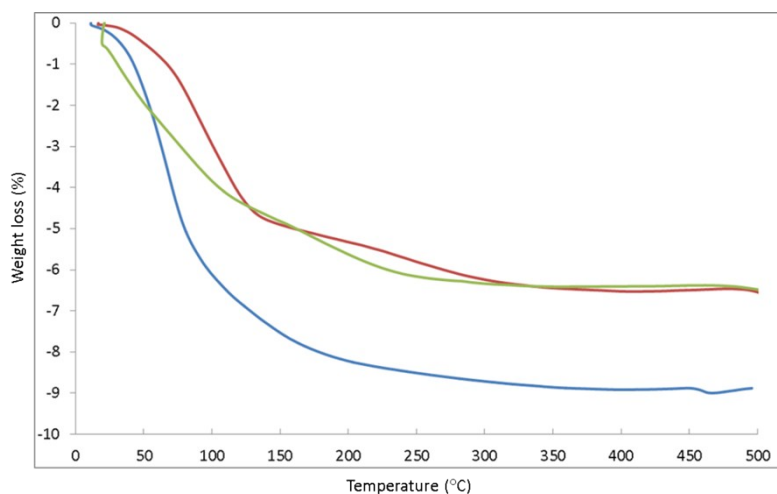

Figure S8: TGA curves of compounds 1 (blue curve), 2 (red curve) and 3 (green curve).

TGA analyses were performed on compound **1-3** to determine the water content of the compound out of their mother liquor. Calculations were performed on the observation of the first loss weight for water molecules until a plateau at 300°C for **1**, **2** and **3** which give respectively 47, 32 and 42 water molecules. These measurements were compared to the calculated values obtained from the water molecules in the RX studies (obs.: 8.7%; calc.: 9.5% for compound **1**, obs.: 6.2%; calc.: 10.4% for compound **2** and obs.: 6.3%; calc.: 8.5% for compound **3**). These differences are due to the loss of disordered water molecules from the lattice when the crystals are removed from the solution which is a classical behavior in polyoxometalate based compounds and result in the collapse of the lattice as can be observed in the SEM images of the compounds.

### EPR measurements



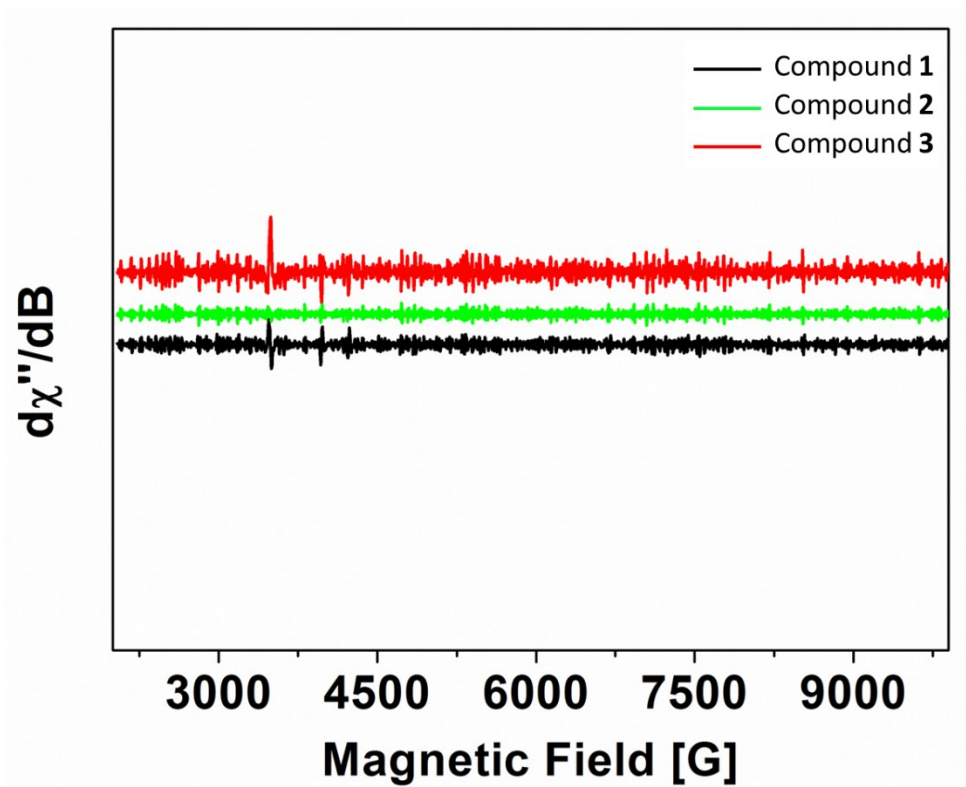

Figure S9: EPR spectra of compound 1, 2 and 3.

<sup>1</sup> SAINT Plus Version 7.53a; *Brucker Analytical X-ray Systems: Madison, WI*, 2008.

<sup>2</sup> G. M. Sheldrick, SADABS, *Brucker-Siemens Area detector Absorption and Other Correction, Version 2008/1; Brucker: Madison, WI*, 2008.

<sup>3</sup> G. M. Sheldrick, *Acta Crystallogr. A*, 2008, **64**, 112-122.

<sup>4</sup> F. Robert, M. Leyrie and G. Hervé, *Acta Cryst.*, 1982, **B38**, 358.

<sup>5</sup> A. Navaza, P. Charpin, D. Vigner and G. Heger, *Acta Crystallogr. C*, 1991, **47**, 1842-1845.
